# Supplementary material for: n-Type doping for efficient polymeric electron-transporting layers in perovskite solar cells
Source: Royal Society of Chemistry journal article supplement (doi:10.1039/c6ta08526a), 2016-01-01
Supplement: c6ta08526a1.pdf [file c6ta08526a1.pdf]

## Supporting Information

### **N-type Doping for Efficient Polymer Electron-transporting Layers in Perovskite Solar Cells**

Yunlong Guo,<sup>a,\*</sup> Wataru Sato,<sup>a</sup> Kento Inoue,<sup>a</sup> Weifeng Zhang,<sup>b</sup> Gui Yu<sup>b,\*</sup> and Eiichi Nakamura<sup>a,\*</sup>

<sup>a</sup>Department of Chemistry, The University of Tokyo 7-3-1 Hongo, Bunkyo-ku, Tokyo 113-0033, Japan.

\*E-mail: [guoyunlong@chem.s.u-tokyo.ac.jp](mailto:guoyunlong@chem.s.u-tokyo.ac.jp); [nakamura@chem.s.u-tokyo.ac.jp](mailto:nakamura@chem.s.u-tokyo.ac.jp)

<sup>b</sup>Beijing National Laboratory for Molecular Sciences, Institute of Chemistry, Chinese Academy of Sciences, Beijing 100190, P. R. China.

\*Email: [yugui@iccas.ac.cn](mailto:yugui@iccas.ac.cn)

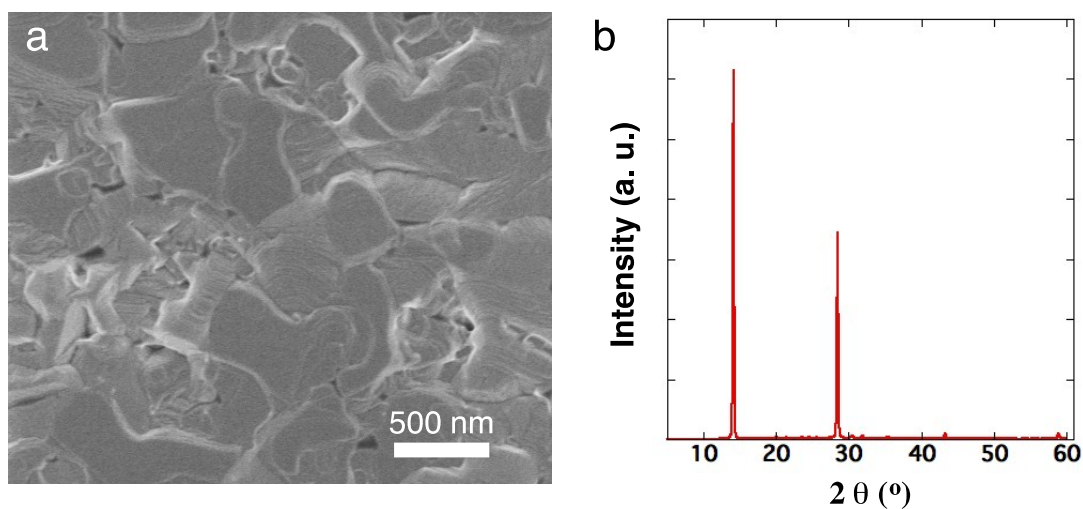

**Figure S1.** Morphology and X-ray diffraction analysis based perovskite films on PEDOT:PSS surface.

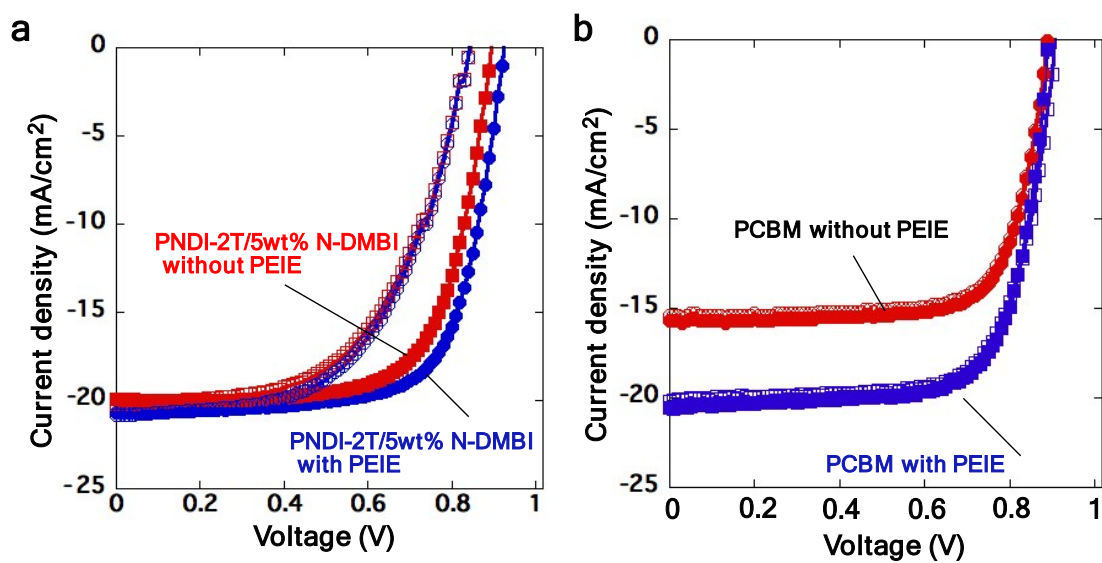

**Figure S2.** The effects of PEIE in the solar cells (a) with PNDI-2T/0.5 wt%N-DMBI as ETL and (b) with PCBM as ETL. Scanning rate is 0.01V/0.01s.

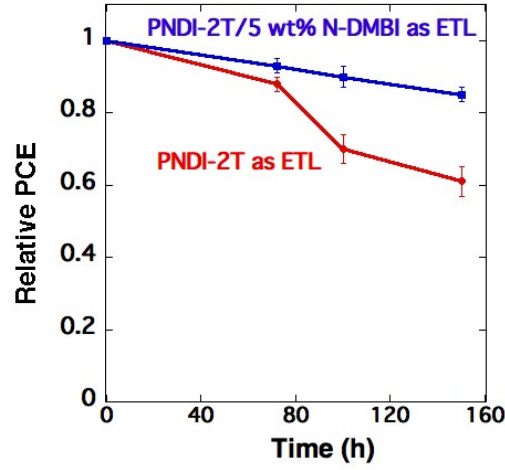

**Figure S3.** Comparing the stability of devices with doped ETL (blue) and nondoped ETLs (red).

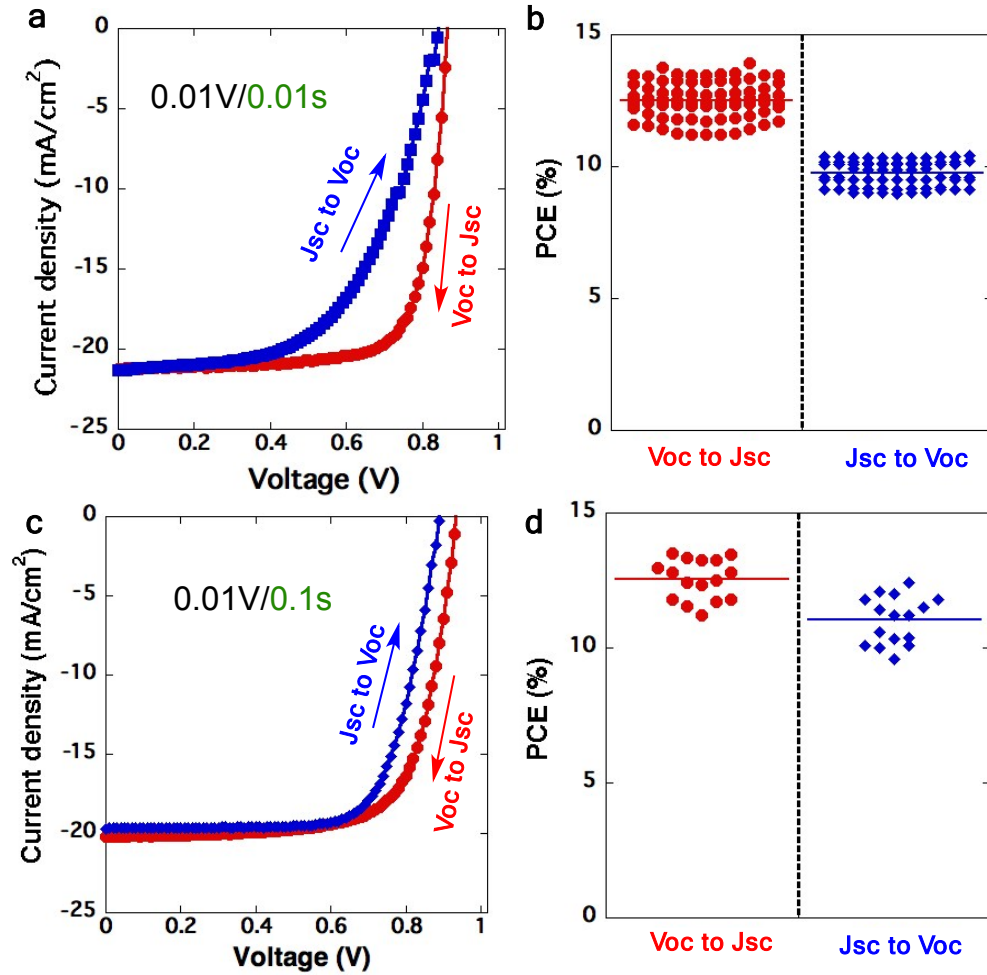

**Figure S4.** J-V characteristics of solar cell scanning forward and reverse. (a) Typical J-V curves of the solar cell scanning forward (red) and reverse (blue) with a scan rate of 0.01V/0.01s. (b) PCE distribution of 70 devices with ETL of PNDI-2T/0.5 wt% N-DMBI scanning forward (red) and reverse (blue). (c) Typical J-V curves of the solar cell scanning forward (red) and reverse (blue) with a scan rate of 0.01V/0.1s. (d) PCE

distribution of 15 devices with ETL of PNDI-2T/0.5 wt%N-DMBI scanning forward (red) and reverse (blue).

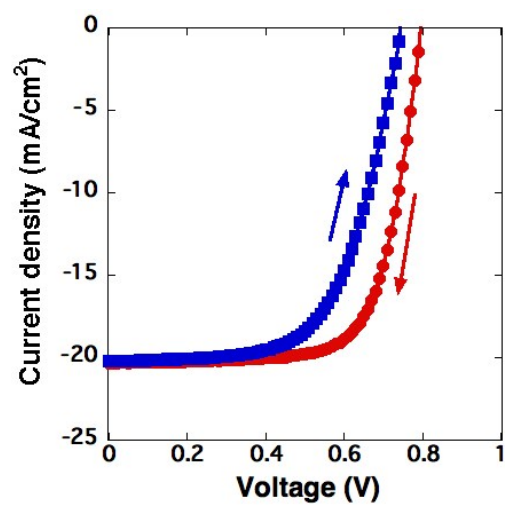

Figure S5. J-V curves of solar cell with about 14 nm PNDI-2T/0.5wt% N-DMBI as ETL under a scan rate of 0.01 V/0.01 s.

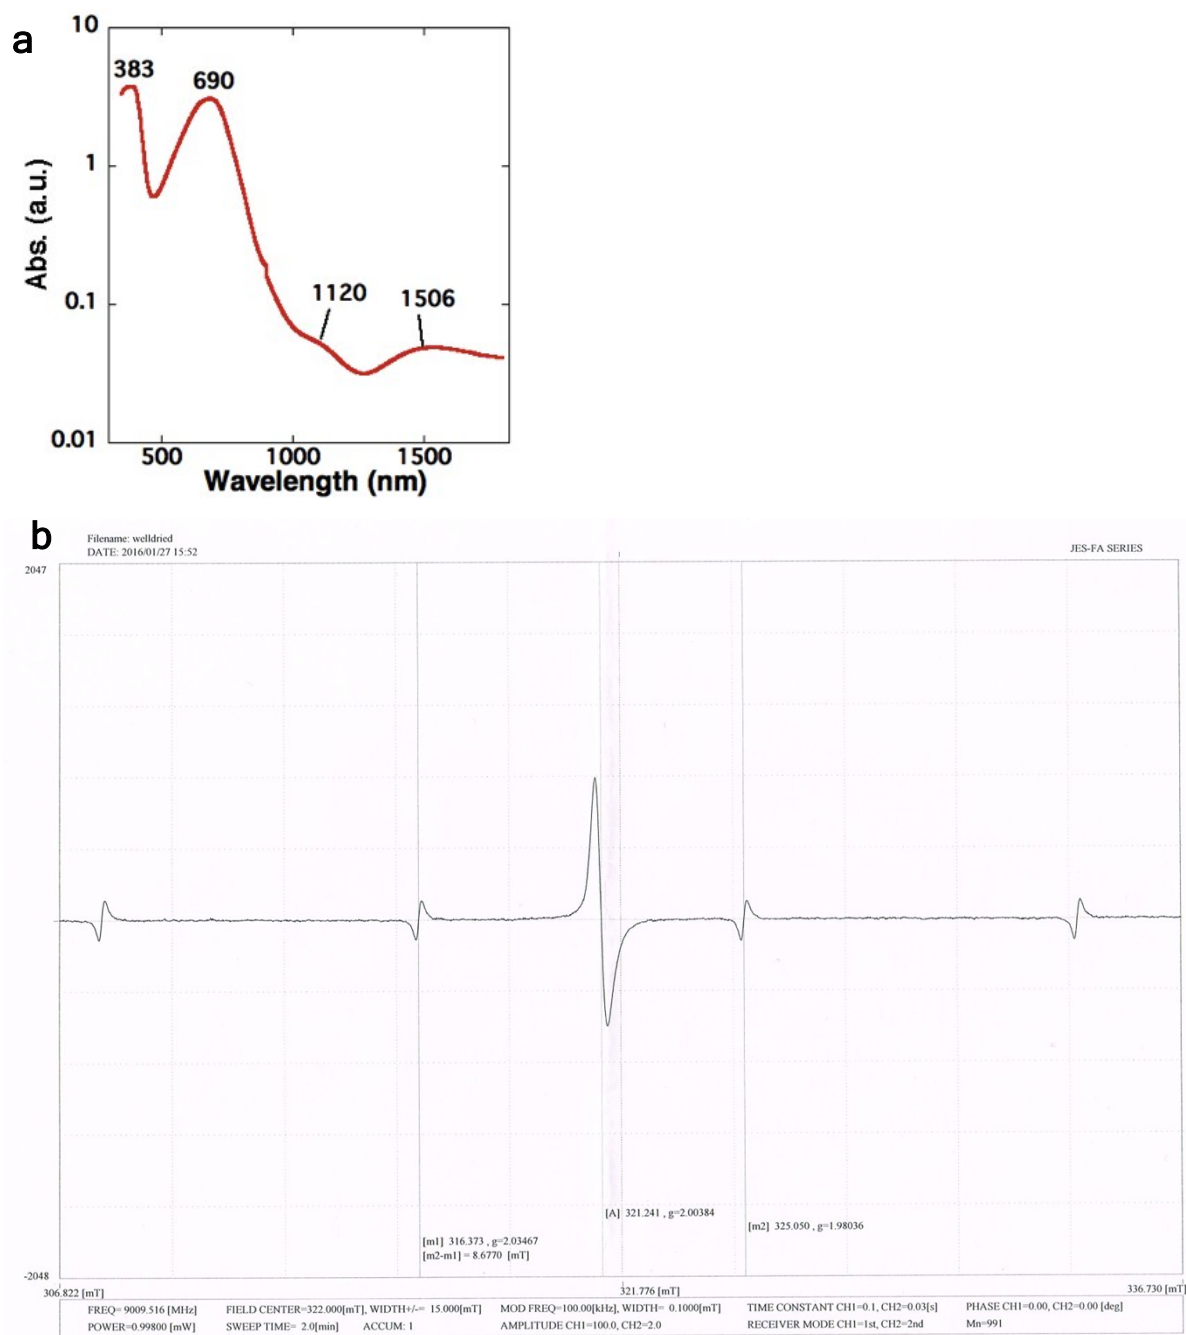

**Figure S6.** UV-vis spectrum (a) and electron spin resonance spectroscopy (ESR) (b) based on PNDI-2T/0.5 wt%N-DMBI materials from slow-drying the solution.
